# Supplementary material
Source: publisher figshare collection journal article supplement (https://frontiersin.figshare.com/ndownloader/files/24765443)

## Supplementary material

### Preliminar optimization of anodization parameters: SEM images of nanotubes prepared in different conditions

Increased nanotubes homogeneity, definition and patency for:

i) Increasing anodization time. Left: anodization for 2,5 hours, right: anodization for 5 hours (water = 8 M, HF = 0,3%)

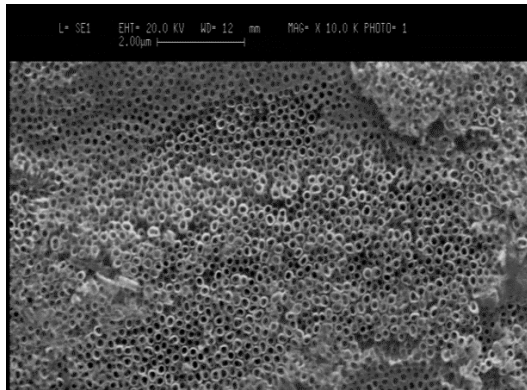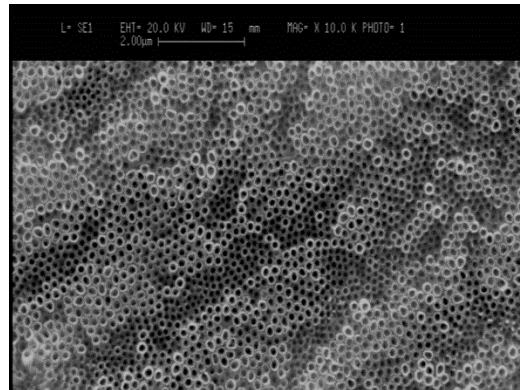

ii) Fluoride content and source. Left: anodization in 0.3 HF, right: anodization in 0.5 NH<sub>4</sub>F (water = 5,5 M – 6M, time = 2,5-3h)

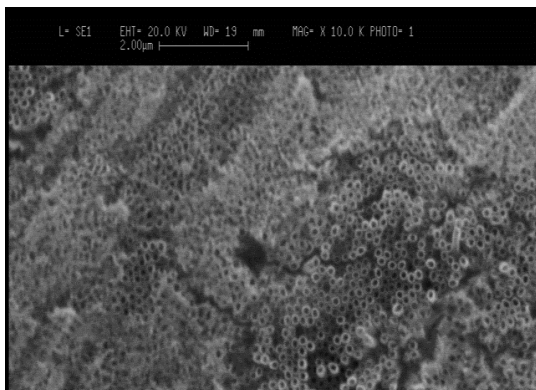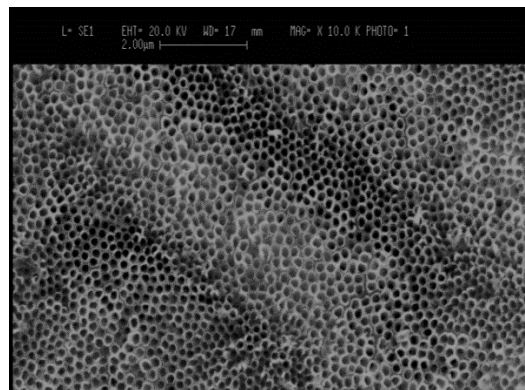

iii) Water molarity. Left: anodization in 6 M water, right: anodization in 8M water (HF = 0.3%, time = 2,5 h).

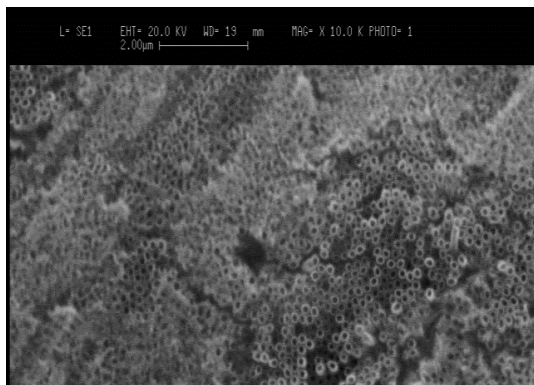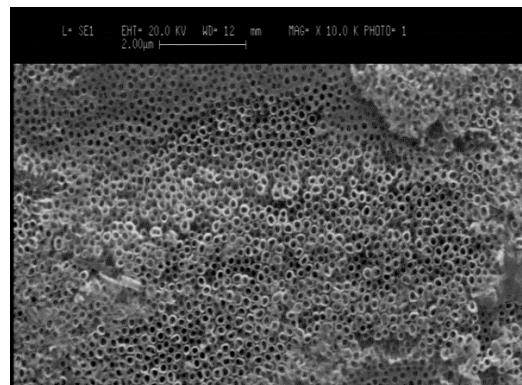

Supplement: Supplementary file 1 [file 24765443]
